# Supplementary material for: A Peptide-Based Neoantigen Vaccine for Patients With Advanced Pancreatic Cancer Refractory to Standard Treatment
Source: Research Square preprint supplement (doi:10.21203/rs.3.rs-130888/v1), 2020-12-21
Supplement: Supplementary file 2 [file 7b5a6fd2aa83cdf53dac9837.xlsx]

## Sheet: Supplementary Table S1
	Supplementary Table S1. The treatment process of patients before and after neoantigen vaccine therapy
Patients	Diagnosed time	Treatment before enrollment					Neoantigen peptide vaccine treatment						Combination chemotherapy	Late follow-up and assessment
		Conversion therapy	Surgery	First-line chemotherapy	Second-line chemotherapy	Others
P01	July,2017	July 2017 to January 2018, AS 8 cycles	March 2018，Laparoscopic radical resection of pancreatic cancer	/	/	/	June 2018 to November 2018						July 2018 to November 2018, AS 5 cycles	For a period of time after the trial, the patient's disease was well controlled; pleural effusion occurred in September 2019, and the disease progressed rapidly. After supportive treatment and chemotherapy, she died in March 2020
P02	April,2016	May 2016 to July 2016, AG 3 cycles	August 2016, pancreatococcygeal combined splenectomy	August 2016 to October 2017, AG 3 cycles+ GS 11 cycles.	November 2017 to May 2018, FOLFIRINOX 10 cycles	/	June 2018 to August 2018						/	After progression, the patients left the group and were treated with chemotherapy locally. The specific situation is unknown.The patient died of progressive disease on December 31, 2018
P03	December,2017	/	December 2017,Laparoscopic radical resection of pancreatic cancer	NA	/	/	October 2018 to February 2019						/	Died in February 2019
P04	October,2017	October 2017 to February 2018, FOLFIRINOX 8 cycles	Patient refused	February 2018 to April 2018, FOLFIRINOX 3 cycles	October 2018 to November 2018, GEMOX 2 cycles,the patients could not tolerate the chemotherapy	/	December,2018 to February 2019						/	The patient was treated locally and died in April 2020 due to tumor progression and biliary obstruction
P05	August, 2017	August 2017 to October 2017, AG 2 cycles;October 2017 to December 2017 GS 3 cycles	Patient refused	December 2017 to February 2018, GS 2 cycles	February 2017 to May 2018, FOLFIRINOX 7 cycles	/	September 2018 to October 2018						/	Died in January 2019
P06	November,2017	/	December 2017, laparoscopic pancreaticoduodenectomy	February 2018 to June 2018, AG 5 cycles，the patients could not tolerate the chemotherapy	/	/	July 2018 to September 2018						/	Died in November 2018
P07	December,2017	/	January 2018，Laparoscopic radical resection of pancreatic cancer	January 2018 to May 2018, AG 4 cycles	June 2018 to December 2018, FOLFIRINOX 13 cycles;From December 2018, the PD-1 inhibitor was combined.	March 2019 to June 2019,AS plus PD-1 inhibitor 5 cycles	August 2019 to October 2019						September 2019, PD-1 inhibitor 1 cycle	Gastric pyloric obstruction on October 2019. Died in January 2020.
	FOLFIRINOX,5-fluorouracil [5-FU], irinotecan, and oxaliplatin;AS, Albumin paclitaxel plus S-1; AG, Albumin paclitaxel plus gemcitabine; GEMOX, oxaliplatin plus gemcitabine; GS, gemcitabine plus S-1

## Sheet: Supplementary Table S2
Supplementary Table S2. QC metrics of whole-exome sequencing for each patient
	P01		P02	陈永江	P03	沈家齐	P04	吕林苗	P05	郑仙国	P06	林解生	P07	林建军
	Normal	Tumor	Normal	Tumor	Normal	Tumor	Normal	Tumor	Normal	Tumor	Normal	Tumor	Normal	Tumor
Q30%	0.9511	0.8656	0.932	0.9227	0.9447	0.8978	0.9379	0.9024	0.9414	0.8637	0.9447	0.8821	0.956	0.9552
[Total] Raw Reads (All reads)	136986313	456410163	73972329	203516471	96941684	328345200	69039548	232823532	90938597	395302256	106480675	207874214	211301468	210937507
[Target] Average depth	275.32	669.35	121.35	337.34	201.61	583.3	141.41	342.2	170.31	639.39	166.24	233.15	387.58	381.55
[Target] Coverage (>=30x)	0.978	0.9959	0.9715	0.9959	0.9857	0.9975	0.974	0.9905	0.9823	0.9975	0.9477	0.9194	0.9954	0.993
[Target] No Coverage	0.0021	0.0035	0.0006	0.0004	0.0017	0.0012	0.0008	0.0003	0.0005	0.0002	0.019	0.014	0.0018	0.0033
Contamination	0.00116	0.08198	0.00066	0.00103	0	0.00462	0.00233	0.02291	0.00125	0.02231	0.00239	0.03802	0.00093	0.00081
Tumor Purity (%)	0.647		0.0032		0.353		0.374		0.28		0.72		0.38

## Sheet: Supplementary Table S3
Supplementary Table S3. Overview of identified neoantigens for each patient
Patient ID	Neoantigen mutations	Predicted epitopes Class I	Predicted epitopes Class II
P01	1808	24800	71175
P02	111	1082	3957
P03	2131	38792	152515
P04	4957	66616	189842
P05	5711	69884	233565
P06	3493	54049	229590
P07	104	760	766

## Sheet: Supplementary Table S4
Supplementary Table S4. Summary of the number of identified somatic mutations, predicted neoantigens and synthesized vaccine peptides
Patient ID		P01	P02	P03	P04	P05	P06	P07
Total mutations	Total number	82340	169	3330	11815	8688	5394	114
	Missense_Mutation	33663	104	2045	7404	5613	3335	96
	In_Frame_InDel	474	7	17	249	51	40	14
	Frame_Shift_InDel	566	4	53	360	55	111	3
	Nonstop_Mutation	104	0	33	51	20	41	1
	Other	47533	54	1182	3751	2949	1867	0
Mutations with more than one neoantigen	Total number	1808	111	2131	4957	5711	3493	104
	Missense_Mutation	1751	103	2077	4615	5598	3316	96
	In_Frame_InDel	22	5	14	135	41	34	8
	Frame_Shift_InDel	31	3	40	179	52	105	0
	Nonstop_Mutation	4	0	0	28	20	38	0
Number of peptides included in vaccine		12	11	12	13	4	13	5

## Sheet: Supplementary Table S5
Supplementary Table S5. HLA allotypes in both normal and tumor cells for each patient
Patient ID	Normal									Tumor
	HLA-class I			HLA-class II						HLA-class I			HLA-class II
	HLA-A	HLA-B	HLA-C	HLA-DQA1	HLA-DQB1	HLA-DPA1	HLA-DPB1	HLA-DRB1		HLA-A	HLA-B	HLA-C	HLA-DQA1	HLA-DQB1	HLA-DPA1	HLA-DPB1	HLA-DRB1
P01	HLA-A30:01	HLA-B40:01	HLA-C06:02	HLA-DQA1*02:01	HLA-DQB1*02:02	HLA-DPA1*02:01	HLA-DPB1*05:01	HLA-DRB1*07:01		HLA-A02:03	HLA-B13:02	HLA-C04:03	HLA-DQA1*02:01	HLA-DQB1*02:02	HLA-DPA1*02:01	HLA-DPB1*05:01	HLA-DRB1*07:01
	HLA-A02:03	HLA-B13:02	HLA-C04:03	HLA-DQA1*06:01	HLA-DQB1*03:01	HLA-DPA1*02:02	HLA-DPB1*17:01	HLA-DRB1*12:02		HLA-A30:01	HLA-B40:01	HLA-C06:02	HLA-DQA1*06:01	HLA-DQB1*03:01	HLA-DPA1*02:02	HLA-DPB1*17:01	HLA-DRB1*12:01
	-	-	-	-	-	-	-	-		-	-	-	-	-	-	-	HLA-DRB1*12:02
P02	HLA-A24:02	HLA-B40:01	HLA-C03:03	HLA-DQA1*03:02	HLA-DQB1*03:01	HLA-DPA1*02:02	HLA-DPB1*02:02	HLA-DRB1*09:01		HLA-A24:02	HLA-B13:01	HLA-C03:03	HLA-DQA1*03:02	HLA-DQB1*03:01	HLA-DPA1*02:02	HLA-DPB1*02:02	HLA-DRB1*09:01
	HLA-A11:01	HLA-B13:01	HLA-C03:04	HLA-DQA1*05:05	HLA-DQB1*03:03	-	HLA-DPB1*19:01	HLA-DRB1*12:01		HLA-A11:01	HLA-B40:01	HLA-C03:04	HLA-DQA1*05:05	HLA-DQB1*03:03	-	HLA-DPB1*19:01	HLA-DRB1*12:01
	-	-	-	HLA-DQA1*05:08	-	-	-	-		-	-	-	HLA-DQA1*05:08	-	-	-	-
P03	HLA-A02:03	HLA-B39:01	HLA-C08:01	HLA-DQA1*01:03	HLA-DQB1*03:01	-	-	HLA-DRB1*08:03		HLA-A02:03	HLA-B39:01	HLA-C08:01	HLA-DQA1*01:03	HLA-DQB1*03:01	-	-	HLA-DRB1*08:03
	HLA-A11:01	HLA-B15:02	HLA-C07:02	HLA-DQA1*06:01	HLA-DQB1*06:01	-	-	HLA-DRB1*12:02		HLA-A11:01	HLA-B15:02	HLA-C07:02	HLA-DQA1*06:01	HLA-DQB1*06:01	-	-	HLA-DRB1*12:02
P04	HLA-A02:01	HLA-B15:07	HLA-C03:03	HLA-DQA1*03:02	HLA-DQB1*03:03	HLA-DPA1*02:02	HLA-DPB1*05:01	HLA-DRB1*09:01		HLA-A02:01	HLA-B15:07	HLA-C01:02	HLA-DQA1*03:02	HLA-DQB1*03:03	HLA-DPA1*02:02	HLA-DPB1*05:01	HLA-DRB1*09:01
	HLA-A11:01	HLA-B46:01	HLA-C01:02	-	-	-	-	-		HLA-A11:01	HLA-B15:01	HLA-C03:03	-	-	-	-	-
P05	HLA-A02:07	HLA-B40:01	HLA-C01:02	HLA-DQA1*01:03	HLA-DQB1*03:01	HLA-DPA1*02:02	HLA-DPB1*02:02	HLA-DRB1*08:03		HLA-A02:07	HLA-B40:01	HLA-C01:02	HLA-DQA1*01:03	HLA-DQB1*03:01	HLA-DPA1*02:02	HLA-DPB1*02:02	HLA-DRB1*08:03
	HLA-A11:01	HLA-B46:01	HLA-C07:02	HLA-DQA1*06:01	HLA-DQB1*06:01	-	HLA-DPB1*05:01	HLA-DRB1*12:02		HLA-A11:01	HLA-B46:01	HLA-C07:02	HLA-DQA1*06:01	HLA-DQB1*06:01	-	HLA-DPB1*05:01	HLA-DRB1*12:02
P06	HLA-A02:03	HLA-B13:01	HLA-C03:04	HLA-DQA1*01:02	HLA-DQB1*05:02	HLA-DPA1*01:03	HLA-DPB1*05:01	HLA-DRB1*12:02		HLA-A02:51	HLA-B13:01	HLA-C03:04	HLA-DQA1*01:02	HLA-DQB1*05:02	HLA-DPA1*01:03	HLA-DPB1*05:01	HLA-DRB1*12:02
	HLA-A11:01	HLA-B40:01	HLA-C04:03	-	HLA-DQB1*06:01	HLA-DPA1*02:02	HLA-DPB1*21:01	HLA-DRB1*15:01		HLA-A11:01	HLA-B40:01	HLA-C04:03	-	HLA-DQB1*06:01	-	HLA-DPB1*21:01	HLA-DRB1*15:01
P07	HLA-A26:01	HLA-B40:01	HLA-C01:04	-	-	-	-	HLA-DRB1*03:17		HLA-A26:01	HLA-B40:01	HLA-C01:04	HLA-DQA1*03:01	-	-	-	HLA-DRB1*03:17
	HLA-A01:02	HLA-B07:03	HLA-C07:02	-	-	-	-	HLA-DRB1*11:30		HLA-A01:02	HLA-B07:03	HLA-C07:02	HLA-DQA1*04:01	-	-	-	HLA-DRB1*11:30

## Sheet: Supplementary Table S6
Supplementary Table S6. Summary of designed and synthesized peptides for each patient
Patient ID	Immunizing pools	Peptide_ID	Gene_name	Chr	POSITION	Ref_bp	Alt_bp	Mutation_type	Designed_peptide_for_synthesis	Tumor Variant Freq.(exome)	Number of Class I epitopes	Number of Class II epitopes	Water solubility
P01	C	2	C19orf54	chr19	41255500	C	G	SNV	LPLPPPPAATGPAPPHVFGLEKSQLLKEAF	0.2033	6	43	Yes
P01	A	3	NLRC5	chr16	57060371	C	A	SNV	HSLLTSFCVCTGPGHKQTGYAFTHLSLQEFLKK	0.15	8	15	Yes
P01	C	5	FHOD3	chr18	34324091	G	A	SNV	TVHKQSLLHHVCTMVIENFPDSSDLY	0.14	13	35	Yes
P01	B	6	FANCM	chr14	45623981	G	A	SNV	EDFMKLYNHLECMFAHTRSTSANGISAIQQG	0.125	16	58	Yes
P01	C	7	GCNT1	chr9	79117751	A	G	SNV	DRLLRAIYMPQNFYCVHVDTKSE	0.12	20	27	Yes
P01	A	9	ANKK1	chr11	113270015	G	C	SNV	KDGWAPLHFAAQNGDDRTARLLLDHGACVDAQ	0.1	7	20	Yes
P01	B	10	CHTOP	chr1	153609068	G	T	SNV	MSAQSAPKVVLKSTTKM	0.1	3	2	Yes
P01	B	12	TP53	chr17	7577558	G	-	Frameshift deletion	KKKKKCTTIHYNYMCNSSAWAA	0.1	15	13	Yes
P01	-	13	FBXO25	chr8	363192	G	A	SNV	CSQKLERENNHCNISHSIILNSEDGEKK	0.0967	20	22	No
P01	-	14	ANK2	chr4	114095671	C	A	SNV	VVEYLKGGIDINTCNKNGLNALHLAAKEGHV	0.09	13	27	No
P01	A	15	ATXN2L	chr16	28847378	A	C	SNV	HPPQSHGGPPQGAVPPSGVPALSASTPSPYP	0.09	5	56	Yes
P01	B	16	CC2D1A	chr19	14020728	G	T	SNV	KKKKDGANDEELEAEFLAFVGGQPPALEKLKGKG	0.09	17	57	Yes
P01	C	26	LCMT2	chr15	43621964	G	-	Frameshift deletion	GQFMLQHFRQLNSPCMAWSVFLTWRRSGAA	0.07	47	60	Yes
P01	A	28	TNFRSF11A	chr18	60027241	C	T	SNV	VEHHGTEKSDVVCSSSLPARKPPNGN	0.07	6	25	Yes
P02	-	2	PSMD10	chrX	107330945	G	T	SNV	LKMIHILLYYKASTKIQDTEGNTPL	0.4925	13	29	No
P02	B	3	KRAS	chr12	25380275	T	A	SNV	KKKLDILDTAGHEEYSAMRDQYMRTGE	0.42	2	11	Yes
P02	C	4	RNF220	chr1	45110737	C	T	SNV	GEAKEREALWGAVLNGGPPSTRITP	0.32	10	34	Yes
P02	C	5	TTLL11	chr9	124584976	G	A	SNV	LVCGRGVPSGGRPPHCGPPQEPSPS	0.3025	7	9	Yes
P02	B	6	SMARCA4	chr19	11095980	C	T	SNV	HQMHKPMESMHEKGMLDDPRYNQMKGMGMRS	0.29	4	7	Yes
P02	A	7	RAP1GAP2	chr17	2911425	C	G	SNV	PEEDKFENGGHGGFVESFKRAIRVRSHSME	0.2725	10	54	Yes
P02	-	8	TNS1	chr2	218712290	G	A	SNV	KEATSDPSWTPEEEPLNLEKKKKK	0.27	7	0	No
P02	C	9	MYO9A	chr15	72144565	T	A	SNV	TDAESVNLDDYNILVIASVFKQWLRDLPNKKK	0.2675	12	48	Yes
P02	A	15	LSG1	chr3	194362826	G	A	SNV	GNRNKKEKSCRLYKHLDM	0.2075	7	14	Yes
P02	B	16	PIK3CA	chr3	178936091	G	A	SNV	QLKAISTRDPLSEITKQEKDFLWSHRHYCVT	0.195	7	29	Yes
P02	A	17	POLR3GL	chr1	145460212	C	T	SNV	ASQGGGRGRGRGQLTFNV	0.1925	2	8	Yes
P02	C	19	PTPRCAP	chr11	67203432	C	A	SNV	GEGDQQCGEASSPEQVPVRKKK	0.1875	2	10	Yes
P02	-	20	SNX6	chr14	35044969	G	A	SNV	LKLSDLLKYYLRESQVAKDLLYRRSRSLVDY	0.175	17	58	No
P02	A	21	ARSI	chr5	149677313	T	A	SNV	ISEGRASPRTEILHNFDPLYNHAQHGSLEGG	0.175	16	36	Yes
P03	-	1	MIF	chr22	23894500	A	G	SNV	MPMFIVNTSVPRASVPDGFLS	0.3875	16	19	No
P03	C	2	HADHB	chr2	26289946	C	T	SNV	KKCAAGGQGHAMIVEAYLK	0.3025	8	8	Yes
P03	A	3	PQBP1	chrX	48902476	A	-	Frameshift deletion	GKERRHPPGGAGSLSQEQEGSKPK	0.295	14	30	Yes
P03	-	4	TP53	chr17	7675143	C	A	SNV	VDSTPPPGTRIRAMAIYKQSQHMTEV	0.2125	15	34	No
P03	A	7	PSMD3	chr17	39996222	G	A	SNV	AKAIRDGVIEASINHKKGYVQSKEMID	0.1575	12	42	Yes
P03	B	9	DNM2	chr19	10833261	G	A	SNV	YRAAGGEGSGLPPPIKEQRPKK	0.13	7	5	Yes
P03	B	10	SPAG16	chr2	213375036	-	CA	Frameshift insertion	HSREKENDHQKVLLRKVFVKPGNKTNVKQR	0.11	16	31	Yes
P03	C	11	MED13L	chr12	116006330	T	C	SNV	TPVPDGKNAMSLFSSATKTDVRQDN	0.1	19	38	Yes
P03	-	13	ANO6	chr12	45439718	T	C	SNV	EYLALLPRLGHSGMISAHCNLRLPVD	0.0833	21	44	No
P03	C	14	FCER1G	chr1	161220408	-	C	Frameshift insertion	EKSDGVYTMESPSITQAGVQWHDLGSLQKK	0.07	22	46	Yes
P03	A	16	GPSM1	chr9	136341025	C	-	Frameshift deletion	AQGEFQGCGGVLLHRHGPHQELRRGG	0.07	13	29	Yes
P03	B	17	GPSM1	chr9	136341025	C	-	Frameshift deletion	RHGPHQELRRGGIEARPAWRRWQPPENG	0.07	22	38	Yes
P03	C	18	GPSM1	chr9	136341025	C	-	Frameshift deletion	ARPAWRRWQPPENGAYKPVLLGLRDSTGL	0.07	38	24	Yes
P03	A	19	SNX21	chr20	45838289	C	G	SNV	KDPPSKYVRQGLAMLARLVSNSWP	0.07	12	36	Yes
P03	A	20	SGSM3	chr22	40404316	G	A	SNV	PLMEDAPQRLQWQAHLEFTHNHDVG	0.07	15	32	Yes
P04	C	1	MEN1	chr11	64572018	T	C	SNV	PEGGSTAQVPAPAASPPPEGPVLKK	0.335	8	3	Yes
P04	B	2	MYH14	chr19	50726572	C	T	SNV	TENTKKVIQYLAHVALSPKGRKEPGV	0.18	13	34	Yes
P04	-	3	TP53	chr17	7578479	G	A	SNV	PVQLWVDSTSPPGTRVRAMAIYKQS	0.165	12	6	No
P04	A	4	ANKRD11	chr16	89351239	T	C	SNV	KKAWSEVSSLSDSTRARLTSESDY	0.145	8	6	Yes
P04	A	5	RPL23	chr17	37004296	T	G	SNV	LRKKVLLCHPGWSAVTPLKLTVTLNKK	0.1433	14	24	Yes
P04	B	6	KRAS	chr12	25398284	C	T	SNV	TEYKLVVVGADGVGKSALTIQLIQNH	0.13	7	6	Yes
P04	A	8	RBM25	chr14	73572607	AG	-	Frameshift deletion	RERERTRARTRTGARERAR	0.1	7	0	Yes
P04	B	9	RBM25	chr14	73572607	AG	-	Frameshift deletion	RAREGTGARKRKRQKTGPRRR	0.1	6	0	Yes
P04	-	10	ZEB1	chr10	31810505	G	C	SNV	SLPKQQGELLQRSTITSVYQNSVYSV	0.0867	12	26	No
P04	A	11	C15orf40	chr15	83657573	GA	-	Frameshift deletion	KSDVVLDKGLTFSPRLEHSGTTSGH	0.07	11	15	Yes
P04	B	12	C15orf40	chr15	83657573	GA	-	Frameshift deletion	HSGTTSGHCSLDFPGSNNPPTSASQV	0.07	12	0	Yes
P04	A	13	C15orf40	chr15	83657573	GA	-	Frameshift deletion	ASQVAGTTGACHPHPANFRIF	0.07	16	0	Yes
P04	B	15	PCTP	chr17	53864996	A	G	SNV	SNPLASASQSAGITGVSHHTRPIRAEPS	0.06	15	7	Yes
P04	C	17	PPP1CB	chr2	29004735	T	-	Frameshift deletion	FCCHGGRLVNLPYRFFFLLLFGKYLKKKK	0.06	26	34	Yes
P04	-	18	SMG5	chr1	156247808	G	-	Frameshift deletion	LRNKLRELCVKLMFCTQWTMGERLRS	0.05	17	21	No
P04	C	20B	SMG5	chr1	156247808	G	-	Frameshift deletion	SLSRLTKSTSTAGALWNVPTGRTWL	0.05	23	11	Yes
P05	-	31	RBM10	chrX	47041437	C	-	Frameshift deletion	RLPRTWNAGPAVSTNKKKTSKIASSLSAPC	0.2	18	56	No
P05	-	7	MYH9	chr22	36716404	A	T	SNV	FYYLLSGAGEHLKTELLLEPYNKYRFLSNG	0.1725	12	48	No
P05	A	8	DISC1	chr1	231902938	G	C	SNV	GDDTHTPLRMEPRLLQPTAQDSLHVSITRRD	0.16	9	27	Yes
P05	-	9	PSTK	chr10	124740063	T	C	SNV	RKRGLCVPCGLPAAGKSTFARAL	0.1467	9	18	No
P05	B	16	MFSD12	chr19	3567148	G	A	SNV	LGSSDSPASASRAVGITEPVPAGGGCR	0.13	5	37	Yes
P05	B	17	EDEM2	chr20	33703379	C	T	SNV	SGPWEPPARPRTLFSPENHDQ	0.1267	7	0	Yes
P05	A	23	CPS1	chr2	211441079	A	T	SNV	KKGEVVFNTGLGGYPDAITDPAYK	0.1133	4	20	Yes
P06	-	1	KRAS	chr12	25398284	C	A	SNV	TEYKLVVVGAVGVGKSALTIQLIQNHK	0.1967	9	43	No
P06	A	2	NLRC5	chr16	57095846	G	A	SNV	SFPTLEACALGFKKKKKKERKKVSE	0.18	8	33	Yes
P06	-	3	PDZRN3	chr3	73450100	C	A	SNV	KKKKKKYIGDIHQDMDREELELEEVDLYR	0.1433	10	5	No
P06	-	4	GALNS	chr16	88891240	C	A	SNV	DRPIFYYRGDTLMASTLGQHKAHFWTWTNS	0.14	11	53	No
P06	-	5	LILRB1	chr19	55146175	A	C	SNV	KKKLLLLLLLLFLLLRHRRQGKHWTSTQR	0.14	19	44	No
P06	C	6	LILRB1	chr19	55146175	A	C	SNV	LLFLLLRHRRQGKHWTSTQR	0.14	4	20	Yes
P06	B	7	SRSF6	chr20	42089202	G	A	SNV	RSRRRSRSRSRRSSHSRSRSISKSRSRSR	0.14	8	17	Yes
P06	B	9	NCAPH2	chr22	50956050	G	T	SNV	KKKKQLSSVQEDRANVVASSGVPQEAENEF	0.1367	6	37	Yes
P06	A	10	STAG1	chr3	136068029	C	T	SNV	VRNKKGQPPLHKKR	0.1367	7	0	Yes
P06	A	12	FAM107B	chr10	14816460	C	T	SNV	RVQPVAKAGRQPRHPNAEGVPEK	0.1033	5	3	Yes
P06	A	13	GTF3C5	chr9	135933277	T	G	SNV	KKKKKKYESGEDEEE	0.1	1	0	Yes
P06	-	14	TAB1	chr22	39811572	G	A	SNV	GVFNGYDGNRVTNFMAQRLSAELLLGQLNA	0.1	14	51	No
P06	B	15	TP53	chr17	7577085	C	T	SNV	PGRDRRTKEENLRKK	0.1	4	0	Yes
P06	B	16	RBBP8NL	chr20	60990862	C	T	SNV	KKKEAEEDHQGMGLRGEEK	0.095	8	0	Yes
P06	C	17	DCAF5	chr14	69589035	G	A	SNV	SGGDDRRVLLWHMEQVIHSRVKPIQLKGEH	0.09	20	57	Yes
P06	C	18	NME4	chr16	449083	A	G	SNV	DGVQRRLVGDVIQRFGRRGFTLVGMKMLQA	0.09	9	57	Yes
P06	A	19	KMT2D	chr12	49445310	G	A	SNV	ASPPPEDSLMSLLLEESPLLPLPKKKK	0.09	19	32	Yes
P06	C	20	SLC2A11	chr22	24226584	A	T	SNV	KKKKKKKVCGALMWIMLFLVGLGFPFIME	0.085	32	34	Yes
P07	-	21	MNDA	chr1	158842174	A	T	SNV	KKKVNEYKNILLLKGFELMDDY	0.5167	7	18	No
P07	A	22B	PACS1	chr11	66070701	C	T	SNV	KKSSSSSISTSMAVK	0.475	4	0	Yes
P07	A	23	TP53	chr17	7673809	C	T	SNV	GRNSFKVRVCACPGRD	0.4675	4	0	Yes
P07	-	24	KRAS	chr12	25245350	C	A	SNV	TEYKLVVVGAVGVGKSALTIKK	0.4625	2	8	No
P07	B	25	RBSN	chr3	15075643	T	C	SNV	KKKRREEMERKRAVER	0.36	2	0	Yes
P07	-	44	SRPRA	chr11	126268057	A	C	SNV	KGNNSFTQEALTLKYKLD	0.34	10	8	No
P07	B	26	SETD1A	chr16	30964227	C	T	SNV	SFSSSRQDTPFSFGQFTPQK	0.3225	20	0	Yes
P07	-	27	ZBTB8A	chr1	32593158	T	C	SNV	KKTATFQAFSPDTSTVILDFVYSGKLSLT	0.3075	13	11	No
P07	A	28	MAP1B	chr5	72198001	T	G	SNV	DTYSHMEGGASVSTAKK	0.19	9	0	Yes
P07	-	32	GALK1	chr17	75764033	GGCAGCCCCCGCAAGGATGGGCTGGTG	-	Nonframeshift deletion	KKKKALELMTVLVSLLTTSEGAD	0.03	6	11	No

## Sheet: Supplementary Table S7
Supplementary Table S7. The concentration of INF-γ in peripheral blood for each patient
	Concentration of INF-γ in peripheral blood (pg/ml)							OS (months) until March 31st 2020
	Baseline	Post vaccination time point 1	Post vaccination time point 2	Post vaccination time point 3	Post vaccination time point 4	Post vaccination time point 5	Post vaccination time point 6
P01		0.35	0.35	0.17	0.21	0.73	1.36	32
P02		0.21	0.3	0.21	0.21	1.84		31.5
P03	1.36	1.31	1.67	1.5	1.85			14
P04	1.03							Not yet reached (>30)a
P05	2.02	2.38	2.02	2.19	2.02			14
P06	0.9	0.73	0.35	0.73	0.73	1.36		11
P07	2.7	3.25						24
aThe last follow up: March. 31, 2020.

## Sheet: Supplementary Table S8
Supplementary Table S8. Mutation of KRAS for each patient
Patient ID	KRAS mutation	Chr	Position	Ref_bp	Alt_bp	Mutation_type	Included in iNeo-Vac-P01
P01	No	-	-	-	-	-	-
P02	Yes	chr12	25380275	T	A	SNV	Yes
P03	Yes	chr12	25245350	C	T	SNV	Yes
P04	Yes	chr12	25398284	C	T	SNV	Yes
P05	No	-	-	-	-	-	-
P06	Yes	chr12	25398284	C	A	SNV	Yes
P07	Yes	chr12	25245350	C	A	SNV	Yes
